# Supplementary material for: Snow Albedo Seasonality and Trend from MODIS Sensor and Ground Data at Johnsons Glacier, Livingston Island, Maritime Antarctica
Source: MDPI journal article supplement (doi:10.3390/s19163569), 2019-08-15
Supplement: s1 [file s1]

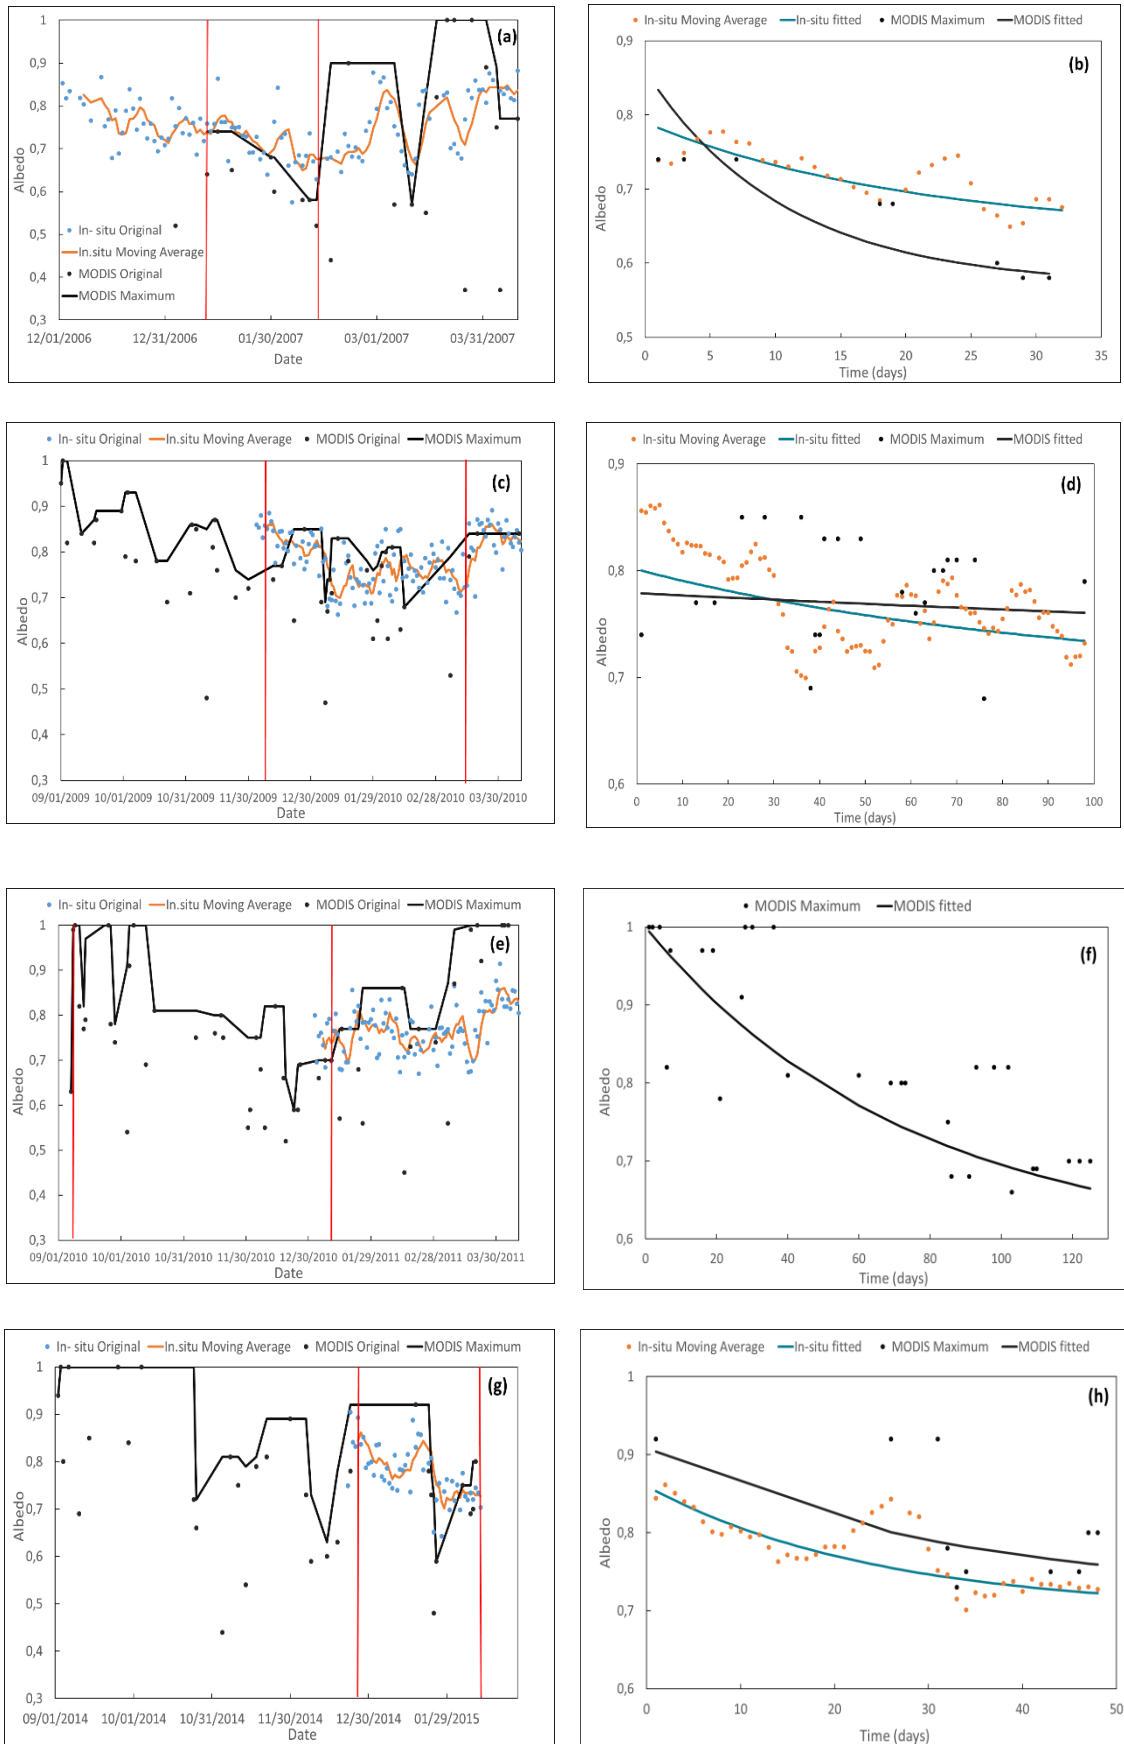

**Figure S1:** Left column: original in-situ albedo (blue dots), original MOD10A1 albedo (black dots), in-situ albedo moving average (brown solid line) and filtered MOD10A1 albedo (black solid line) from 1

September to 10 April. Right column: in-situ albedo moving average (brown dots) and filtered MOD10A1 albedo and the corresponding fit to the exponential decay. Season 2006–2007 ((a) and (b)), season 2009–2010 ((c) and (d)), season 2010–2011 ((e) and (f)), season 2014–2015 ((g) and (h)). The vertical red lines in (a), (c), (e) and (g) indicate the start and end dates of the snow melting.

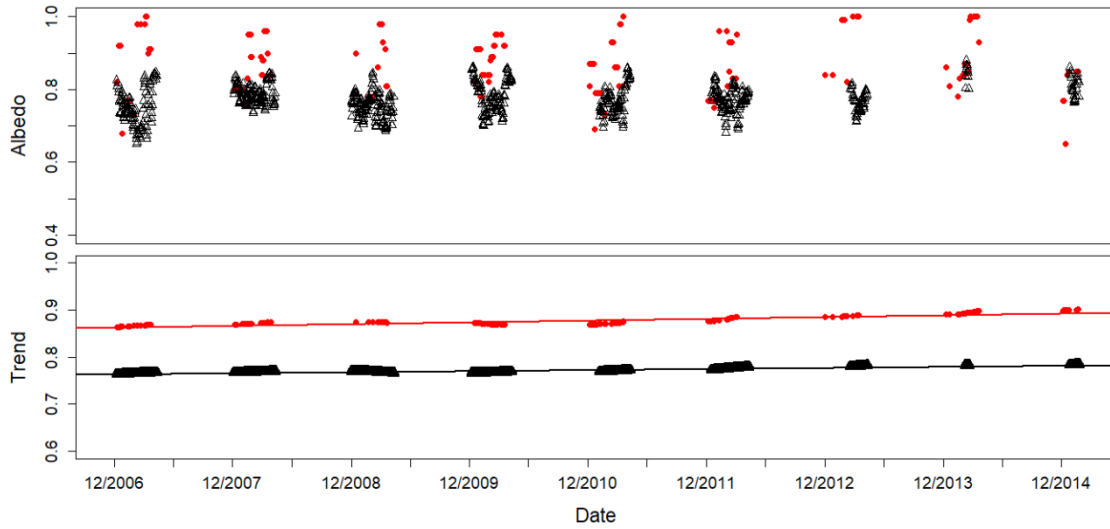

**Figure S2:** MOD10A1 version 6 and in-situ data trend analysis. Moving average of in-situ albedo (open triangles) and maximum values of MOD10A1 albedo (red dots) from 1 December to 10 April (upper figure) and the calculated trends of in-situ moving average (open triangles) and MOD10A1 maximum albedo (red dots) from 1 December to 10 April (bottom figure). The linear fits of the trend are also shown.
